# Supplementary material
Source: publisher site journal article supplement (https://en-cdn.bio-protocol.org/attached/file/20170918/Supplementary%20file%20Table%20S1.docx)
Supplement: Supplementary file 1 [file Supplementary%20file%20Table%20S1.docx]

**Table S1. Maize genotypes used in this study.** The accession name, status, collection country, mean of PrimDLA at 16 dpi, AUDPC, IP, collection year and providers are given.

| Order | Accession name | Status | Country | Mean of PrimDLA | AUDPC | Mean of IP | Collection year | Providers |
| --- | --- | --- | --- | --- | --- | --- | --- | --- |
| 1 | ZEA 1 | Cultivar | Germany | 19.29% | 311.61 | 16 | 1948 | IPK Genebank |
| 2 | ZEA 3 | Landrace | Germany | 0.00% | 57.29 | 23 | 1956 | IPK Genebank |
| 3 | ZEA 16 | Cultivar | Poland | 85.00% | 1075.00 | 11 | 1947 | IPK Genebank |
| 4 | ZEA 24 | Cultivar | Germany | 95.71% | 1127.50 | 11 | 1947 | IPK Genebank |
| 5 | ZEA 53 | Cultivar | Former Yoguslav | 50.00% | 828.48 | 14 | 1949 | IPK Genebank |
| 6 | ZEA 60 | Cultivar | Austria | 32.86% | 723.21 | 13 | 1959 | IPK Genebank |
| 7 | ZEA 61 | Cultivar | Austria | 80.00% | 973.13 | 11 | 1949 | IPK Genebank |
| 8 | ZEA 87 | Landrace | USA | 92.86% | 1161.43 | 11 | 1951 | IPK Genebank |
| 9 | ZEA 95 | Cultivar | Canada | 0.00% | 0.00 | 25 | 1952 | IPK Genebank |
| 10 | ZEA 116 | Cultivar | Hungary | 0.00% | 0.00 | 25 | 1952 | IPK Genebank |
| 11 | ZEA 137 | Cultivar | Bulgaria | 100.00% | 1300.00 | 11 | 1953 | IPK Genebank |
| 12 | ZEA 149 | Cultivar | Former Yoguslav | 45.63% | 821.79 | 16 | 1955 | IPK Genebank |
| 13 | ZEA 161 | Cultivar | Romania | 65.00% | 922.08 | 11 | 1956 | IPK Genebank |
| 14 | ZEA 176 | Cultivar | Czech Republic | 56.67% | 767.08 | 14 | 1956 | IPK Genebank |
| 15 | ZEA 177 | Cultivar | Czech Republic | 85.00% | 1036.50 | 12 | 1956 | IPK Genebank |
| 16 | ZEA 179 | Cultivar | Czech Republic | 5.83% | 225.17 | 22 | 1956 | IPK Genebank |
| 17 | ZEA 182 | Cultivar | Russia | 0.00% | 20.00 | 18 | 1956 | IPK Genebank |
| 18 | ZEA 185 | Cultivar | Russia | 85.71% | 996.79 | 12 | 1956 | IPK Genebank |
| 19 | ZEA 187 | Landrace | Ukraine | 80.00% | 966.56 | 12 | 1958 | IPK Genebank |
| 20 | ZEA 193 | Cultivar | USA | 2.50% | 106.00 | 22 | 1958 | IPK Genebank |
| 21 | ZEA 211 | Cultivar | China | 0.00% | 8.93 | 24 | 1956 | IPK Genebank |
| 22 | ZEA 218 | Cultivar | China | 67.86% | 885.71 | 14 | 1956 | IPK Genebank |
| 23 | ZEA 219 | Cultivar | USA | 60.62% | 981.25 | 12 | 1958 | IPK Genebank |
| 24 | ZEA 235 | Cultivar | Mexico | 56.43% | 736.79 | 15 | 1958 | IPK Genebank |
| 25 | ZEA 256 | Cultivar | Austria | 31.00% | 627.00 | 15 | 1959 | IPK Genebank |
| 26 | ZEA 260 | Cultivar | Russia | 21.67% | 419.58 | 15 | 1961 | IPK Genebank |
| 27 | ZEA 262 | Cultivar | Canada | 49.38% | 754.69 | 13 | 1960 | IPK Genebank |
| 28 | ZEA 270 | Cultivar | Czech Republic | 100.00% | 1220.00 | 11 | 1960 | IPK Genebank |
| 29 | ZEA 272 | Cultivar | Former Yoguslav | 80.63% | 1017.81 | 12 | 1962 | IPK Genebank |
| 30 | ZEA 276 | Cultivar | Poland | 63.13% | 801.25 | 13 | 1959 | IPK Genebank |
| 31 | ZEA 285 | Cultivar | Poland | 40.83% | 725.21 | 15 | 1961 | IPK Genebank |
| 32 | ZEA 311 | Cultivar | Czech Republic | 67.50% | 934.17 | 12 | 1963 | IPK Genebank |
| 33 | ZEA 312 | Cultivar | Germany | 61.43% | 796.47 | 14 | 1963 | IPK Genebank |
| 34 | ZEA 316 | Cultivar | Belarus | 80.83% | 1060.83 | 13 | 1965 | IPK Genebank |
| 35 | ZEA 327 | Cultivar | Austria | 18.33% | 448.41 | 17 | 1963 | IPK Genebank |

**Table S1. Continued**

| 36 | ZEA 328 | Cultivar | Austria | 66.67% | 865.83 | 13 | 1963 | IPK Genebank |
| --- | --- | --- | --- | --- | --- | --- | --- | --- |
| 37 | ZEA 342 | Cultivar | Romania | 53.33% | 821.67 | 12 | 1967 | IPK Genebank |
| 38 | ZEA 357 | Cultivar | Hungary | 62.14% | 899.64 | 13 | 1976 | IPK Genebank |
| 39 | ZEA 358 | Cultivar | Romania | 33.33% | 565.17 | 18 | 1977 | IPK Genebank |
| 40 | ZEA 360 | Cultivar | Bulgaria | 67.14% | 852.14 | 13 | 1977 | IPK Genebank |
| 41 | ZEA 370 | Cultivar | Russia | 28.00% | 665.17 | 17 | 1979 | IPK Genebank |
| 42 | ZEA 374 | Landrace | Germany | 86.25% | 1114.38 | 11 | 1975 | IPK Genebank |
| 43 | ZEA 376 | Cultivar | Russia | 83.00% | 1102.58 | 11 | 1979 | IPK Genebank |
| 44 | ZEA 379 | Landrace | Germany | 40.00% | 782.86 | 14 | 1983 | IPK Genebank |
| 45 | ZEA 380 | Cultivar | Romania | 17.14% | 379.24 | 19 | 1983 | IPK Genebank |
| 46 | ZEA 385 | Cultivar | Russia | 88.50% | 1063.50 | 11 | 1984 | IPK Genebank |
| 47 | ZEA 389 | Cultivar | Mexico | 68.13% | 932.59 | 13 | 1986 | IPK Genebank |
| 48 | ZEA 408 | Landrace | Albania | 22.50% | 368.33 | 19 | 1946 | IPK Genebank |
| 49 | ZEA 413 | Landrace | Albania | 77.50% | 702.50 | 12 | 1946 | IPK Genebank |
| 50 | ZEA 427 | Landrace | Greece | 0.00% | 0.00 | 25 | 1946 | IPK Genebank |
| 51 | ZEA 470 | Landrace | Greece | 43.33% | 770.67 | 13 | 1971 | IPK Genebank |
| 52 | ZEA 472 | Landrace | Greece | 39.44% | 621.11 | 16 | 1972 | IPK Genebank |
| 53 | ZEA 477 | Landrace | Albania | 41.67% | 555.33 | 17 | 1972 | IPK Genebank |
| 54 | ZEA 493 | Landrace | Albania | 40.00% | 785.00 | 13 | 1946 | IPK Genebank |
| 55 | ZEA 506 | Landrace | Albania | 48.33% | 815.00 | 15 | 1946 | IPK Genebank |
| 56 | ZEA 567 | Landrace | USA | 0.00% | 0.00 | 24 | 1947 | IPK Genebank |
| 57 | ZEA 570 | Landrace | USA | 100.00% | 1238.88 | 11 | 1948 | IPK Genebank |
| 58 | ZEA 614 | Landrace | Italy | 100.00% | 1178.21 | 11 | 1951 | IPK Genebank |
| 59 | ZEA 628 | Landrace | Romania | 66.67% | 901.67 | 15 | 1956 | IPK Genebank |
| 60 | ZEA 629 | Landrace | Albania | 100.00% | 1188.44 | 11 | 1956 | IPK Genebank |
| 61 | ZEA 632 | Landrace | China | 97.50% | 1111.56 | 11 | 1957 | IPK Genebank |
| 62 | ZEA 634 | Landrace | Former Yoguslav | 21.25% | 358.75 | 19 | 1957 | IPK Genebank |
| 63 | ZEA 640 | Landrace | Russia | 80.00% | 983.75 | 13 | 1961 | IPK Genebank |
| 64 | ZEA 668 | Landrace | Former Yoguslav | 56.43% | 808.29 | 16 | 1946 | IPK Genebank |
| 65 | ZEA 679 | Cultivar | Hungary | 0.00% | 53.07 | 22 | 1967 | IPK Genebank |
| 66 | ZEA 682 | Cultivar | Hungary | 43.75% | 616.25 | 16 | 1967 | IPK Genebank |
| 67 | ZEA 684 | Cultivar | Former Yoguslav | 53.57% | 790.89 | 15 | 1964 | IPK Genebank |
| 68 | ZEA 690 | Landrace | France | 48.57% | 626.07 | 14 | 1973 | IPK Genebank |
| 69 | ZEA 695 | Landrace | France | 58.57% | 815.36 | 12 | 1973 | IPK Genebank |
| 70 | ZEA 707 | Landrace | Germany | 38.75% | 666.79 | 15 | 1975 | IPK Genebank |
| 71 | ZEA 712 | Landrace | Czech Republic | 53.00% | 812.00 | 13 | 1977 | IPK Genebank |
| 72 | ZEA 713 | Landrace | Czech Republic | 100.00% | 1084.00 | 12 | 1977 | IPK Genebank |
| 73 | ZEA 720 | Landrace | Slovakia | 41.25% | 681.56 | 13 | 1978 | IPK Genebank |

**Table S1. Continued**

| 74 | ZEA 721 | Landrace | Czech Republic | 49.00% | 774.00 | 14 | 1978 | IPK Genebank |
| --- | --- | --- | --- | --- | --- | --- | --- | --- |
| 75 | ZEA 724 | Landrace | Czech Republic | 91.88% | 1074.69 | 12 | 1978 | IPK Genebank |
| 76 | ZEA 725 | Landrace | Czech Republic | 65.63% | 966.56 | 13 | 1978 | IPK Genebank |
| 77 | ZEA 729 | Landrace | USA | 63.13% | 832.05 | 14 | 1979 | IPK Genebank |
| 78 | ZEA 731 | Landrace | Bulgaria | 65.63% | 748.75 | 12 | 1976 | IPK Genebank |
| 79 | ZEA 732 | Landrace | Bulgaria | 67.86% | 841.25 | 12 | 1976 | IPK Genebank |
| 80 | ZEA 734 | Landrace | Bulgaria | 31.43% | 608.54 | 14 | 1976 | IPK Genebank |
| 81 | ZEA 754 | Landrace | Italy | 56.25% | 759.38 | 16 | 1982 | IPK Genebank |
| 82 | ZEA 776 | Landrace | Slovakia | 45.00% | 778.75 | 13 | 1982 | IPK Genebank |
| 83 | ZEA 780 | Landrace | Bulgaria | 79.17% | 1006.25 | 12 | 1976 | IPK Genebank |
| 84 | ZEA 781 | Landrace | Bulgaria | 0.00% | 57.50 | 23 | 1976 | IPK Genebank |
| 85 | ZEA 783 | Landrace | Russia | 58.33% | 716.22 | 13 | 1984 | IPK Genebank |
| 86 | ZEA 799 | Landrace | Libya | 70.63% | 938.13 | 12 | 1983 | IPK Genebank |
| 87 | ZEA 1001 | Landrace | Libya | 87.86% | 1130.89 | 11 | 1984 | IPK Genebank |
| 88 | ZEA 1005 | Landrace | Germany | 84.29% | 1112.14 | 12 | 1984 | IPK Genebank |
| 89 | ZEA 1024 | Landrace | Italy | 55.00% | 680.00 | 15 | 1985 | IPK Genebank |
| 90 | ZEA 1036 | Landrace | Romania | 55.00% | 748.21 | 13 | 1985 | IPK Genebank |
| 91 | ZEA 1038 | Landrace | Romania | 89.38% | 1145.31 | 11 | 1985 | IPK Genebank |
| 92 | ZEA 1056 | Landrace | North Korea | 22.86% | 493.75 | 15 | 1985 | IPK Genebank |
| 93 | ZEA 1057 | Landrace | North Korea | 67.50% | 924.69 | 12 | 1985 | IPK Genebank |
| 94 | ZEA 1060 | Landrace | North Korea | 0.00% | 10.63 | 24 | 1985 | IPK Genebank |
| 95 | ZEA 1064 | Landrace | North Korea | 0.00% | 156.67 | 20 | 1985 | IPK Genebank |
| 96 | ZEA 1073 | Landrace | Bulgaria | 51.00% | 771.75 | 14 | 1976 | IPK Genebank |
| 97 | ZEA 1075 | Landrace | Cuba | 19.29% | 337.95 | 17 | 1986 | IPK Genebank |
| 98 | ZEA 1086 | Landrace | Italy | 83.13% | 1028.13 | 11 | 1988 | IPK Genebank |
| 99 | ZEA 1105 | Landrace | North Korea | 57.50% | 729.69 | 12 | 1986 | IPK Genebank |
| 100 | ZEA 1108 | Landrace | North Korea | 6.43% | 165.71 | 20 | 1989 | IPK Genebank |
| 101 | ZEA 1109 | Landrace | North Korea | 6.00% | 188.50 | 21 | 1989 | IPK Genebank |
| 102 | ZEA 1113 | Landrace | Ukraine | 100.00% | 1273.13 | 11 | 1988 | IPK Genebank |
| 103 | ZEA 1118 | Landrace | Italy | 90.00% | 1121.43 | 11 | 1989 | IPK Genebank |
| 104 | ZEA 1128 | Landrace | Austria | 73.00% | 938.00 | 12 | 1990 | IPK Genebank |
| 105 | ZEA 1136 | Landrace | Italy | 53.33% | 798.01 | 15 | 1990 | IPK Genebank |
| 106 | ZEA 3006 | Landrace | Georgia | 36.67% | 609.26 | 17 | 1982 | IPK Genebank |
| 107 | ZEA 3021 | Landrace | Georgia | 6.00% | 343.00 | 19 | 1983 | IPK Genebank |
| 108 | ZEA 3062 | Landrace | Georgia | 18.75% | 414.56 | 16 | 1984 | IPK Genebank |
| 109 | ZEA 3066 | Landrace | Georgia | 0.00% | 0.00 | 25 | 1984 | IPK Genebank |
| 110 | ZEA 3073 | Landrace | Georgia | 0.00% | 0.00 | 25 | 1984 | IPK Genebank |
| 111 | ZEA 3110 | Landrace | Georgia | 0.00% | 0.00 | 25 | 1985 | IPK Genebank |

**Table S1. Continued**

| 112 | ZEA 3128 | Landrace | Georgia | 21.43% | 450.68 | 18 | 1986 | IPK Genebank |
| --- | --- | --- | --- | --- | --- | --- | --- | --- |
| 113 | ZEA 3134 | Landrace | Georgia | 1.88% | 301.61 | 21 | 1986 | IPK Genebank |
| 114 | ZEA 3159 | Landrace | Georgia | 29.00% | 612.50 | 14 | 1986 | IPK Genebank |
| 115 | ZEA 3196 | Landrace | Georgia | 0.00% | 0.00 | 25 | 1988 | IPK Genebank |
| 116 | ZEA 3211 | Landrace | Georgia | 15.00% | 308.75 | 19 | 1989 | IPK Genebank |
| 117 | ZEA 3447 | Cultivar | Cuba | 34.00% | 454.00 | 16 | 1982 | IPK Genebank |
| 118 | ZEA 3460 | Landrace | Cuba | 0.00% | 15.94 | 24 | 1986 | IPK Genebank |
| 119 | ZEA 3467 | Landrace | Iraq | 100.00% | 1093.75 | 12 | 1987 | IPK Genebank |
| 120 | ZEA 3479 | Landrace | Cuba | 0.00% | 0.00 | 25 | 1987 | IPK Genebank |
| 121 | ZEA 3482 | Landrace | Cuba | 1.00% | 98.00 | 21 | 1987 | IPK Genebank |
| 122 | ZEA 3484 | Cultivar | Cuba | 27.50% | 364.38 | 19 | 1987 | IPK Genebank |
| 123 | ZEA 3491 | Landrace | Cuba | 0.00% | 15.83 | 25 | 1988 | IPK Genebank |
| 124 | ZEA 3505 | Landrace | Colombia | 0.00% | 7.50 | 25 | 1989 | IPK Genebank |
| 125 | ZEA 3509 | Landrace | Colombia | 0.00% | 0.00 | 25 | 1989 | IPK Genebank |
| 126 | ZEA 3511 | Landrace | Peru | 15.63% | 285.31 | 18 | 1988 | IPK Genebank |
| 127 | ZEA 3512 | Landrace | Colombia | 1.43% | 214.64 | 20 | 1988 | IPK Genebank |
| 128 | RP1 | Breedling line |  | 64.00% | 879.75 | 13 |  | KWS |
| 129 | RP1Htn1 | Breedling line |  | 0.00% | 0.00 | 25 |  | KWS |
| 130 | KWS 1 | Breedling line |  | 4.50% | 178.82 | 20 |  | KWS |
| 131 | KWS 2 | Breedling line |  | 0.00% | 2.81 | 24 |  | KWS |
| 132 | KWS 3 | Breedling line |  | 87.50% | 1085.63 | 12 |  | KWS |
| 133 | KWS 4 | Breedling line |  | 0.00% | 0.00 | 25 |  | KWS |
